# Supplementary material for: Polycyclic Aromatic Hydrocarbons Detected in Processed Meats Cause Genetic Changes in Colorectal Cancers
Source: MDPI journal article supplement (doi:10.3390/ijms222010959), 2021-10-11
Supplement: s1 [file s1]

**Table S2.** Forward and reverse primer sequences used for qPCR.

| <b>Target gene</b> | <b>Forward primer</b>   | <b>Reverse primer</b>     |
|--------------------|-------------------------|---------------------------|
| <i>GAPDH</i>       | 5'-CTTTTGCCTCGCCAG      | 5'-TTGATGGCAACAATATCCAC   |
| <i>TP53</i>        | 5'-ACCTATGGAACTACTTCCTG | 5'-ACCATTGTTCAATATCGTCC   |
| <i>APC</i>         | 5'-AGAGGTCATCTCAGAACAAG | 5'-CATGTTGATTCTCCCACTC    |
| <i>CTNNB1</i>      | 5'-CTTGGAATGAGACTGCTG   | 5'-AGAGTGAAAAGAACGATAGC   |
| <i>KRAS</i>        | 5'-GGCCTGCTGAAAATGACTG  | 5'-CTTGCTTCCTGTAGGAATCCTC |
