# Supplementary material for: Polycyclic Aromatic Hydrocarbons Detected in Processed Meats Cause Genetic Changes in Colorectal Cancers
Source: MDPI journal article supplement (doi:10.3390/ijms222010959), 2021-10-11
Supplement: s1 [file s1]

**Table S1.** Average levels of PAHs detected in supermarket meat samples in ug/kg. (nd = not detected).

|                    | ACNY  | FL    | PHEN   | ANTH   | PYR   | B[a]A | CHRY  | B[b]F | B[k]F | B[a]P | I[123-cd]P | D[a]A | B[ghi]P | Sum PAHs |
|--------------------|-------|-------|--------|--------|-------|-------|-------|-------|-------|-------|------------|-------|---------|----------|
| Roast turkey       | nd    | 1.78  | 14.29  | 16.03  | 1.18  | nd    | nd    | 28.92 | 28.55 | nd    | nd         | nd    | nd      | 90.75    |
| Roast beef         | nd    | 1.22  | 10.96  | 12.71  | 0.29  | nd    | nd    | 2.32  | 3.98  | 13.50 | nd         | nd    | nd      | 44.97    |
| Roast chicken      | nd    | 1.34  | 11.53  | 13.98  | 0.41  | nd    | nd    | nd    | 0.58  | 2.29  | nd         | nd    | nd      | 30.13    |
| Frankfurt          | nd    | 1.04  | 12.56  | 15.04  | nd    | nd    | nd    | nd    | 2.60  | 1.21  | nd         | nd    | nd      | 32.44    |
| Single smoked ham  | nd    | nd    | 11.13  | 12.92  | nd         | nd    | nd      | 24.04    |
| Double smoked ham  | nd    | 1.20  | 18.30  | 21.08  | nd    | nd    | 0.73  | nd    | nd    | nd    | nd         | nd    | nd      | 41.31    |
| Triple smoked ham  | nd    | 2.37  | 23.32  | 27.02  | nd         | nd    | nd      | 52.72    |
| Salami             | 1.84  | 11.14 | 28.68  | 34.13  | nd         | nd    | nd      | 75.80    |
| Sum PAHs           | 1.84  | 20.09 | 130.77 | 152.90 | 1.87  | -     | 0.73  | 31.23 | 35.71 | 17.00 | -          | -     | -       |          |
| Mean [PAH]         | 1.84  | 5.02  | 29.06  | 33.98  | 0.94  | -     | 0.73  | 20.82 | 14.28 | 8.50  | -          | -     | -       |          |
| SD                 | 0.00  | 6.97  | 38.63  | 45.19  | 0.74  | -     | 0.00  | 16.07 | 16.53 | 7.94  | -          | -     | -       |          |
| Frequency detected | 12.5% | 87.5% | 100.0% | 100.0% | 37.5% | -     | 12.5% | 25.0% | 37.5% | 37.5% | -          | -     | -       |          |
